# Supplementary material for: A Near-Zero Power Triboelectric Wake-Up System for Autonomous Beaufort Scale of Wind Force Monitoring
Source: MDPI journal article supplement (doi:10.3390/nanoenergyadv1020006), 2021-10-01
Supplement: s1 [file s1]

# A Near-Zero Power Triboelectric Wake-Up System for Autonomous Beaufort Scale of Wind Force Monitoring

Tong Tong <sup>1,2</sup>, Guoxu Liu <sup>1,2</sup>, Yuan Lin <sup>1,3</sup>, Shaohang Xu <sup>1,2</sup> and Chi Zhang <sup>1,2,4,5,\*</sup>

<sup>1</sup> CAS Center for Excellence in Nanoscience, Beijing Key Laboratory of Micro-nano Energy and Sensor, Beijing Institute of Nanoenergy and Nanosystems, Chinese Academy of Sciences, Beijing 101400, China; ttongg126@126.com (T.T.); liuguoxu@binn.cas.cn (G.L.); 1911301021@st.gxu.edu.cn (Y.L.); xushaohangucas@163.com (S.X.)

<sup>2</sup> School of Nanoscience and Technology, University of Chinese Academy of Sciences, Beijing 100049, China

<sup>3</sup> School of Mechanical Engineering, Guangxi University, Nanning 530004, China

<sup>4</sup> Center on Nanoenergy Research, School of Physical Science and Technology, Guangxi University, Nanning 530004, China

<sup>5</sup> Tribotronics Research Group, Beijing Institute of Nanoenergy and Nanosystems, Chinese Academy of Sciences, Beijing 100029, China

\* Correspondence: czhang@binn.cas.cn

| Beaufort Scale of Wind Force | Calm  | Light Air | Light Breeze | Gentle Breeze | Moderate Breeze |
|------------------------------|-------|-----------|--------------|---------------|-----------------|
| Wind Speed Ranges (m/s)      | 0-0.2 | 0.3-1.5   | 1.6-3.3      | 3.4-5.4       | 5.5-7.9         |

**Figure S1.** The wind speed ranges corresponding to the Beaufort scale of wind force at grade 1-4.

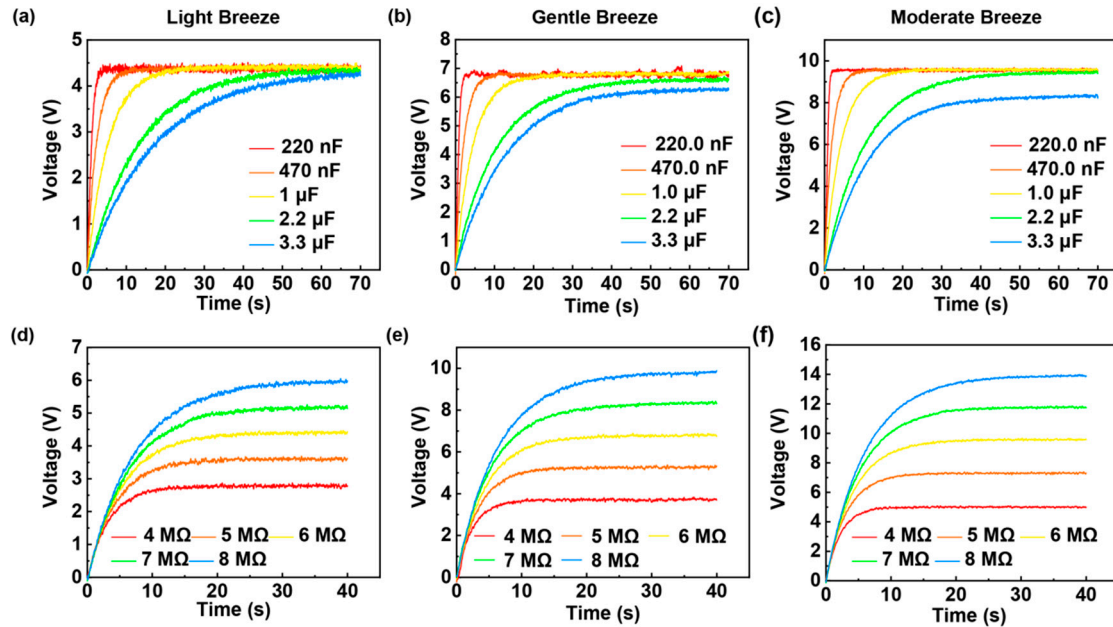

**Figure S2.** The voltage of the C1 with different capacitance in light breeze (a), gentle breeze (b), and moderate breeze (c). The voltage of the C1 with different resistance in light breeze (d), gentle breeze (e), and moderate breeze (f).

|                                                         |   |   |   |
|---------------------------------------------------------|---|---|---|
| Calm ( $V_{C1} < 2\text{ V}$ )                          |   |   |   |
| 0                                                       | 0 | 0 | 0 |
| Light Air ( $2\text{ V} \leq V_{C1} < 4\text{ V}$ )     |   |   |   |
| 1                                                       | 0 | 0 | 0 |
| Light Breeze ( $4\text{ V} \leq V_{C1} < 6\text{ V}$ )  |   |   |   |
| 1                                                       | 1 | 0 | 0 |
| Gentle Breeze ( $6\text{ V} \leq V_{C1} < 8\text{ V}$ ) |   |   |   |
| 1                                                       | 1 | 1 | 0 |
| Moderate Breeze ( $V_{C1} \geq 8\text{ V}$ )            |   |   |   |
| 1                                                       | 1 | 1 | 1 |

**Figure S3.** The output of the comparator with the Beaufort scale of wind force at grade 1-4.

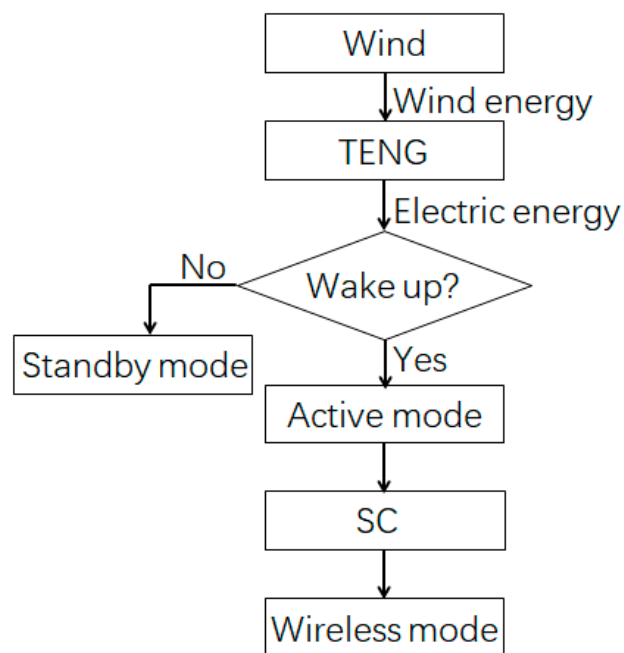

**Figure S4.** The flow chart of the NP-TWS.

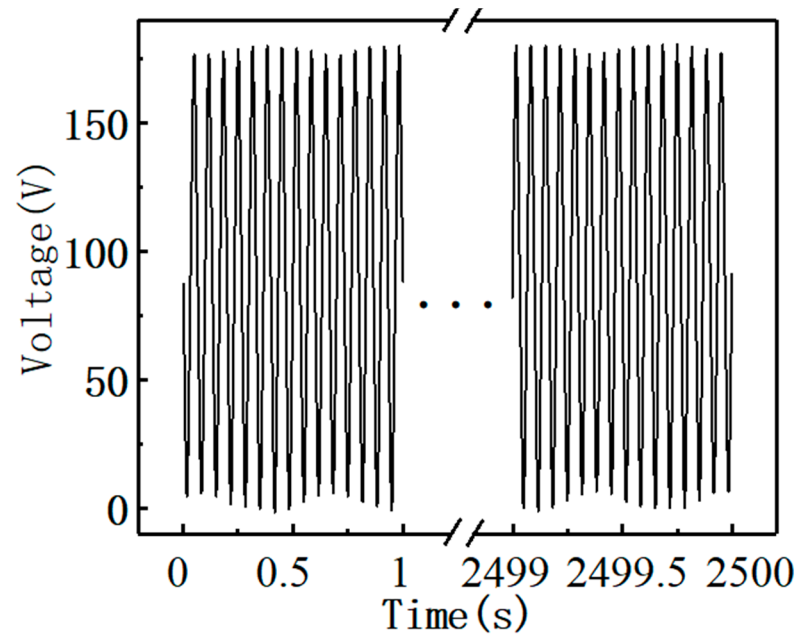

**Figure S5.** Durability test of TENG result.

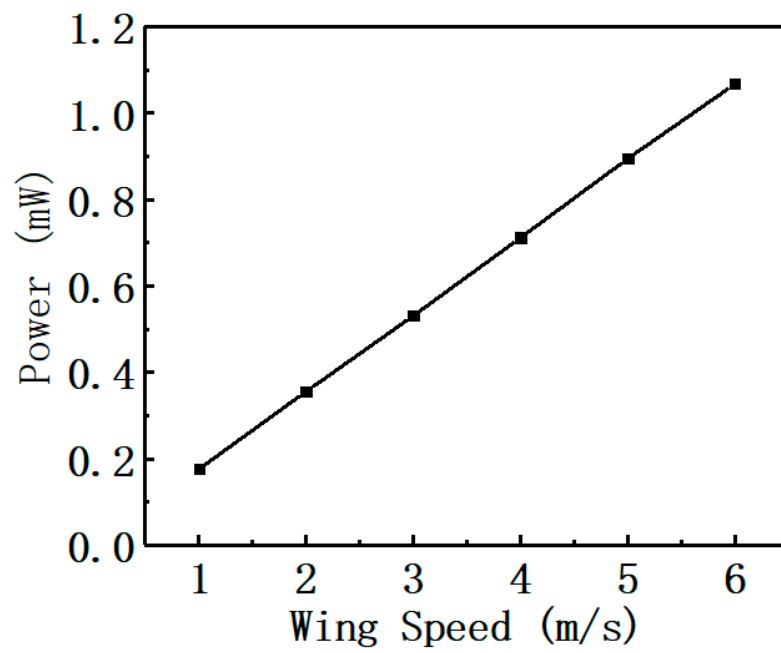

**Figure S6.** The output power of TENG.

**Video S1.** The dynamic display of Beaufort scale of wind force monitoring.
